# Supplementary material for: The impact of COVID-19 pandemic and lockdown on chronic stress assessed by hair cortisol analysis via LC-MS/MS
Source: publisher site journal article supplement (doi:10.1515/labmed-2025-0112), 2025-11-02
Supplement: Supplementary file 1 [file j_labmed-2025-0112_suppl_001.docx]

**Supplementary materials**

**Fig. S1** Multiple Reaction Monitoring (MRM) chromatograms of a cortisol free hair sample (a) spiked with cortisol at low (b), intermediate (c) and high (d) concentration levels.

**
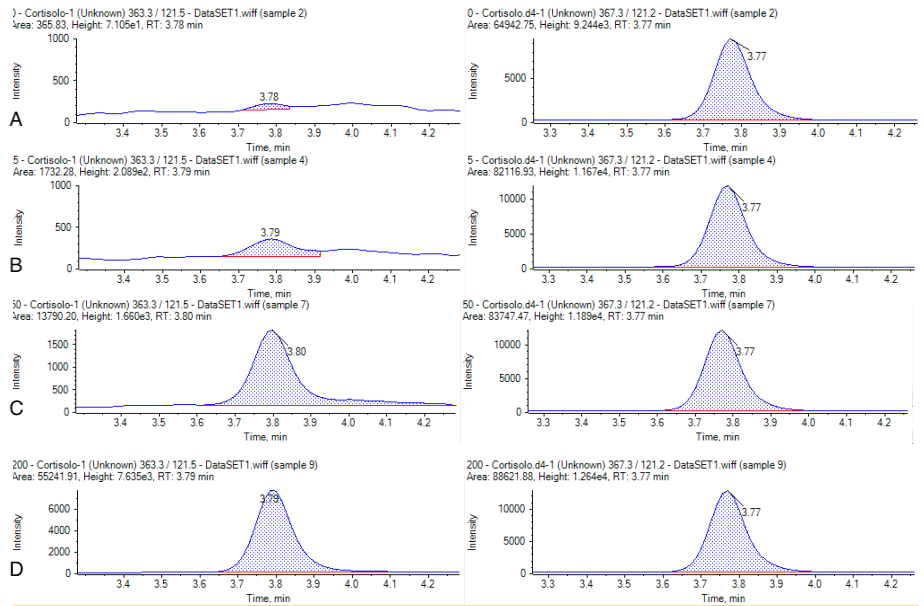
**
